# Supplementary material
Source: PubMed Central journal article supplement (PMC4427561)

A

Methylation  
Status:

Sequence:

1. Fully

5' GCTCACCCGCGCCCA**T**GGTGGGAGCCGGAGACG-FAM 3'  
 3' CGAGTGGGCGCGGG**T**ACCACCCTCGGCCTCTGC 5'

2. Hemi

5' GCTCACCCGCGCCCA**T**GGTGGGAGCCGGAGACG-FAM 3'  
 3' CGAGTGGGCGCGGG**T**ACCACCCTCGGCCTCTGC 5'

3. Non

5' GCTCACCCGCGCCCA**T**GGTGGGAGCCGGAGACG-FAM 3'  
 3' CGAGTGGGCGCGGG**T**ACCACCCTCGGCCTCTGC 5'

A = 6mA

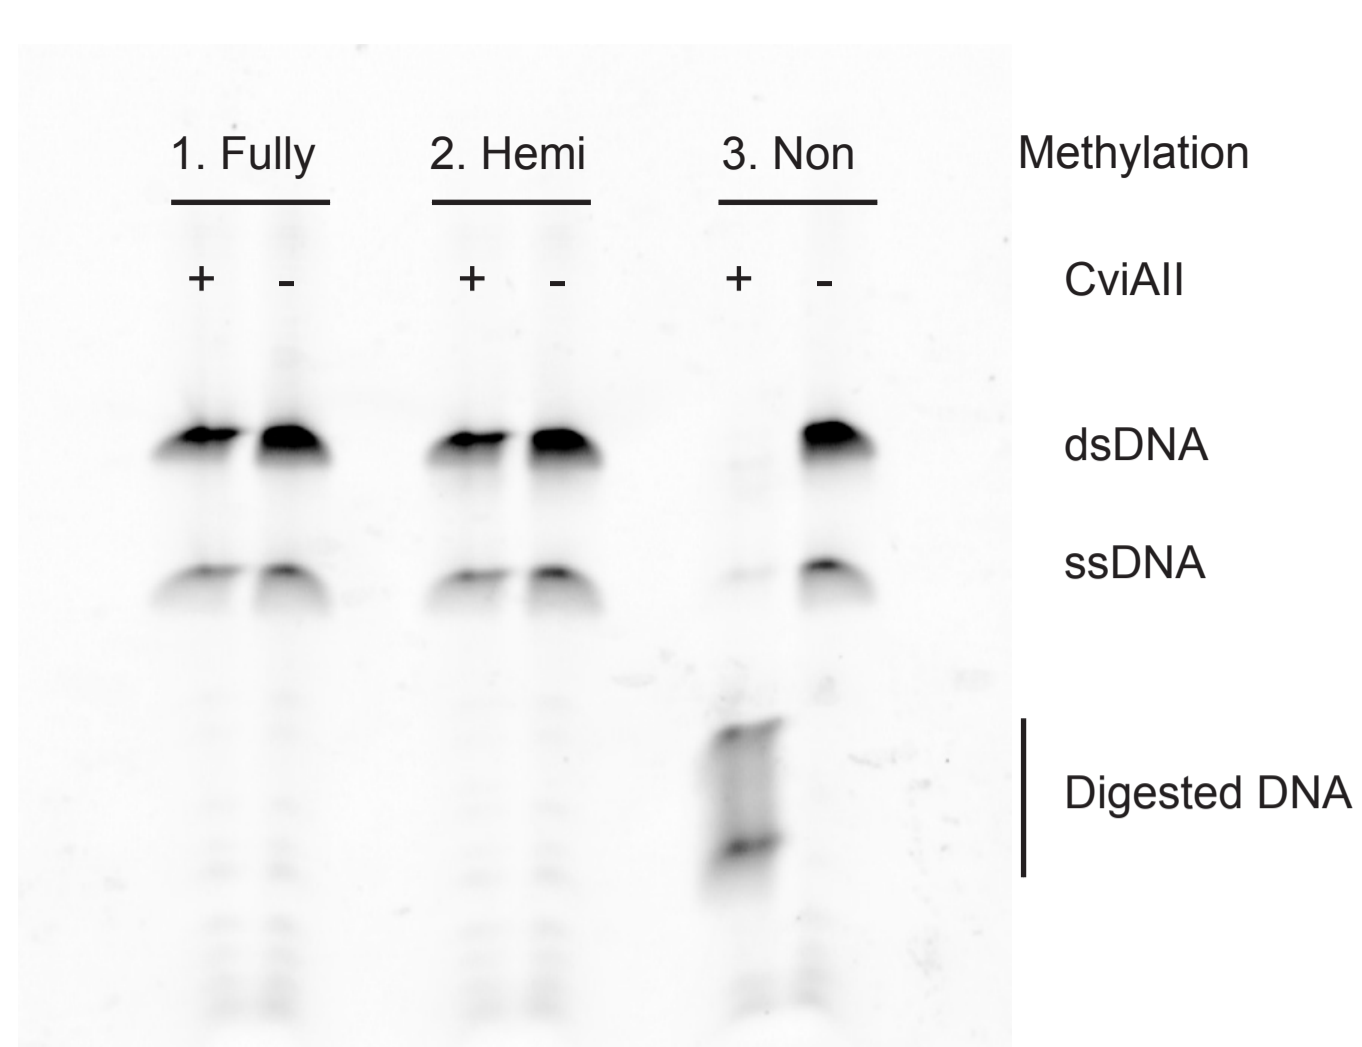

B

Sequence content across all bases  
CviAI-RE-seq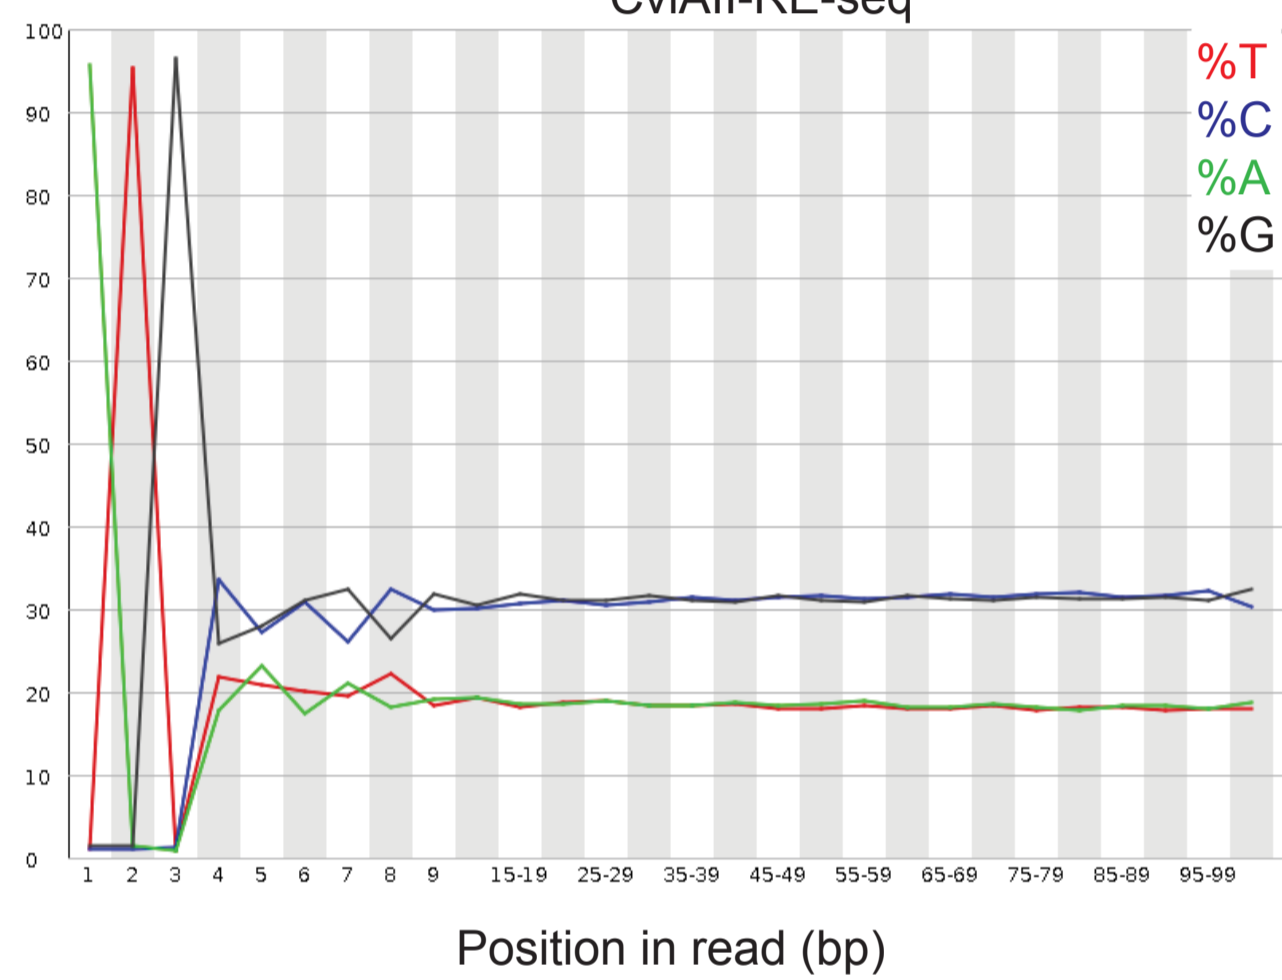

C

Sequence content across all bases  
DpnII-RE-seq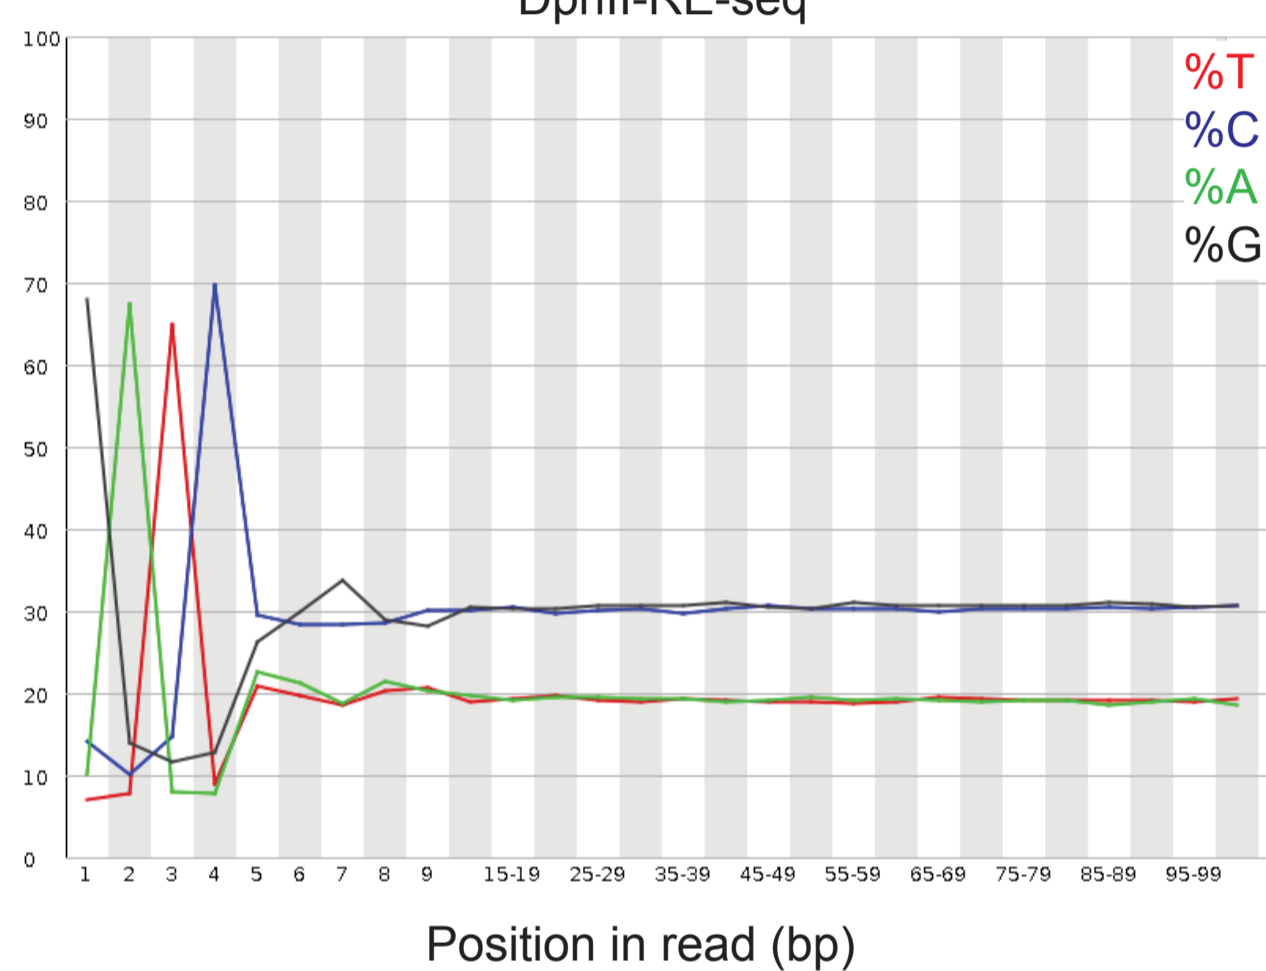

Supplement: NIHMS680140-supplement-4.pdf [file NIHMS680140-supplement-4.pdf]
