# Supplementary material
Source: PubMed Central journal article supplement (PMC4427561)

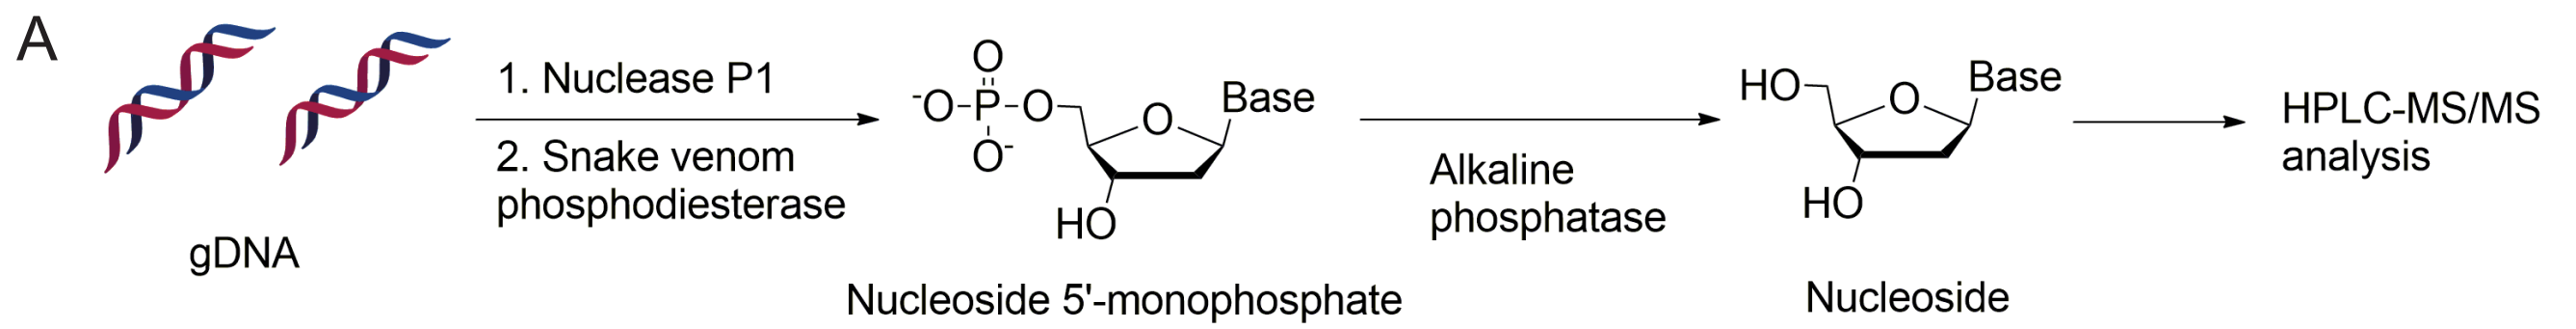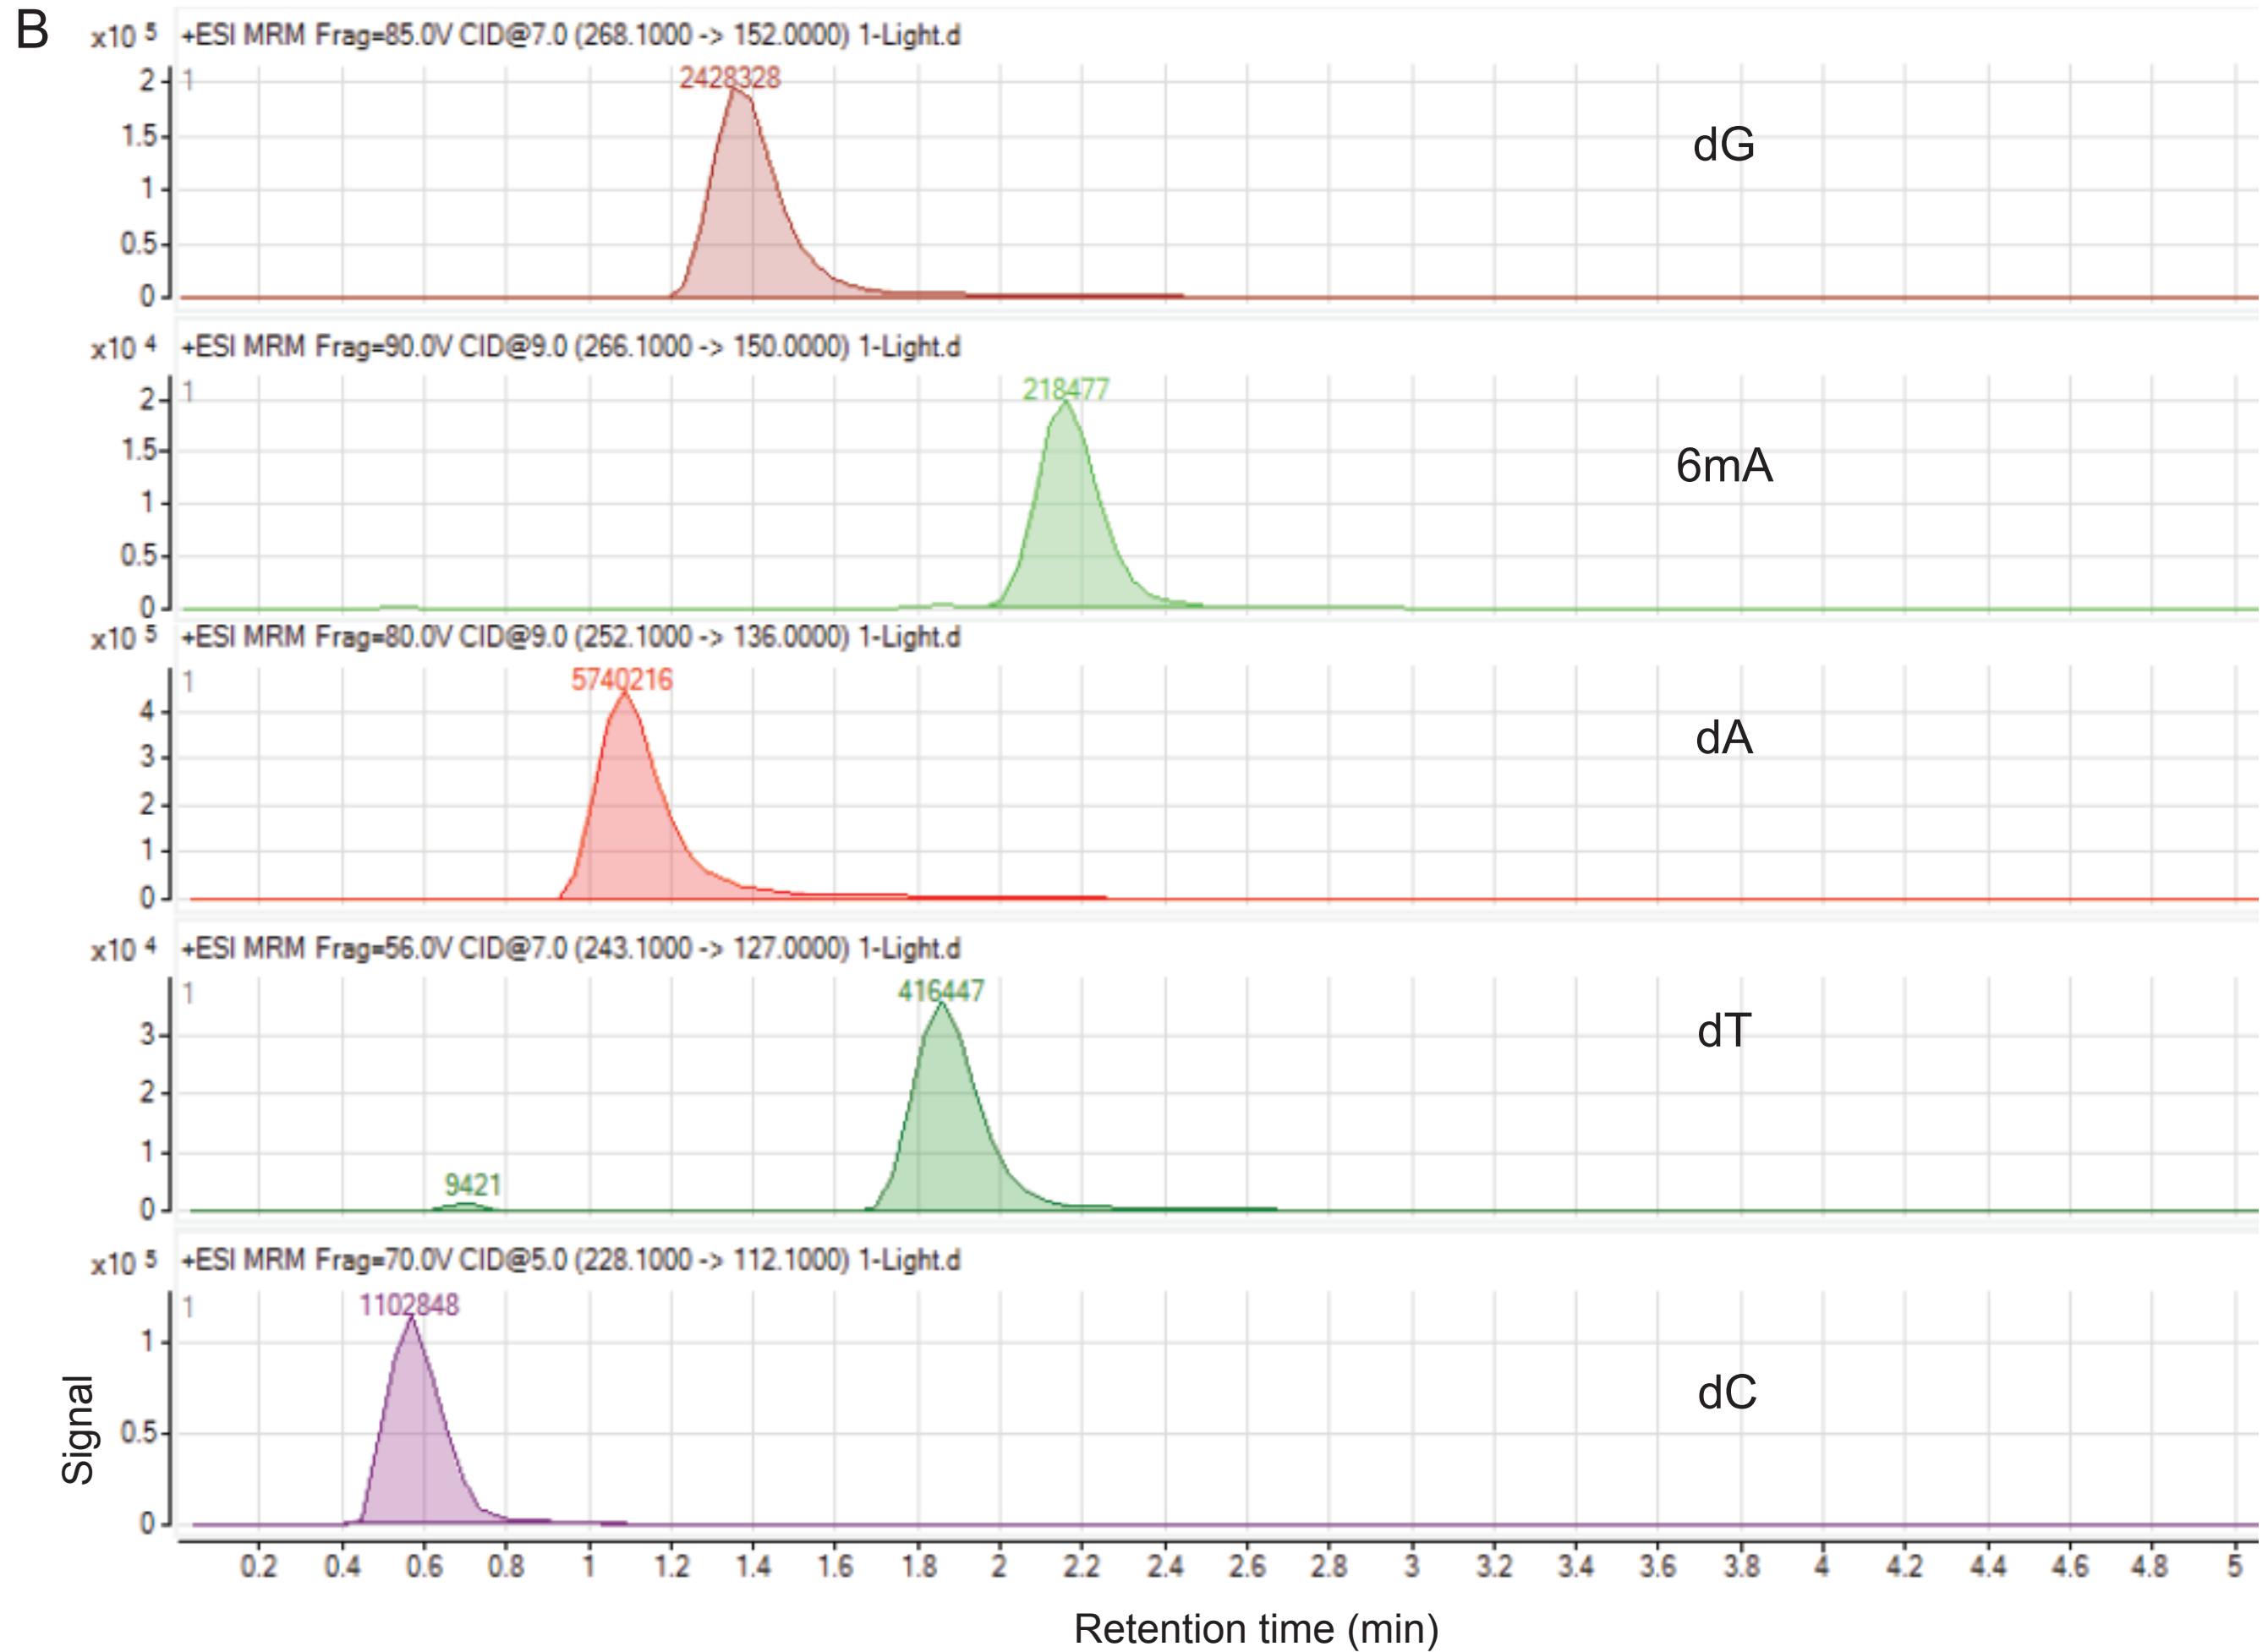

Supplement: NIHMS680140-supplement-1.pdf [file NIHMS680140-supplement-1.pdf]

A

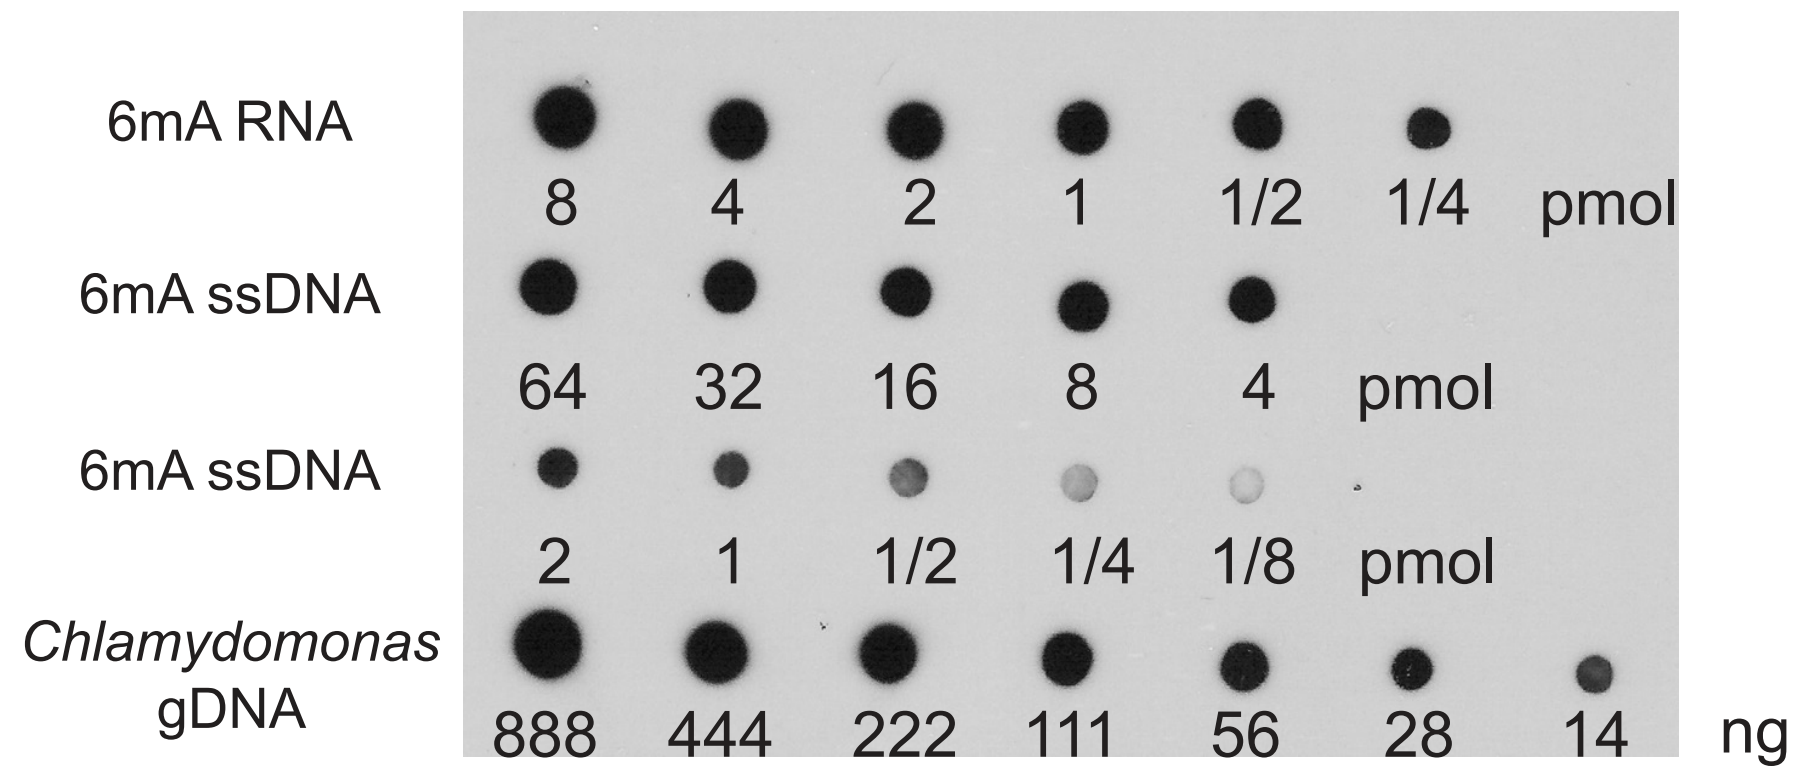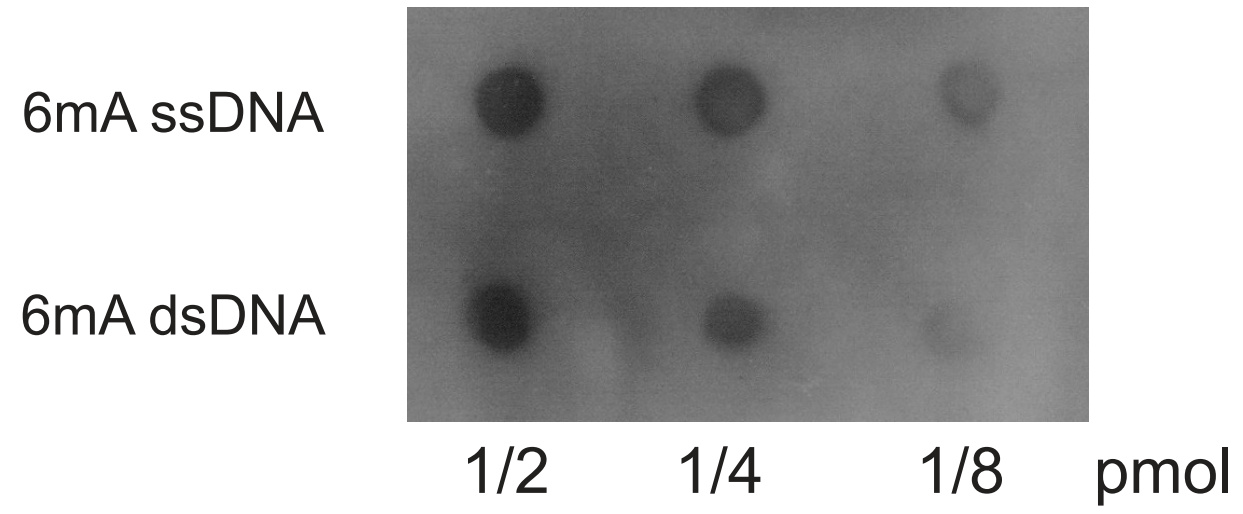

Supplement: NIHMS680140-supplement-2.pdf [file NIHMS680140-supplement-2.pdf]

A

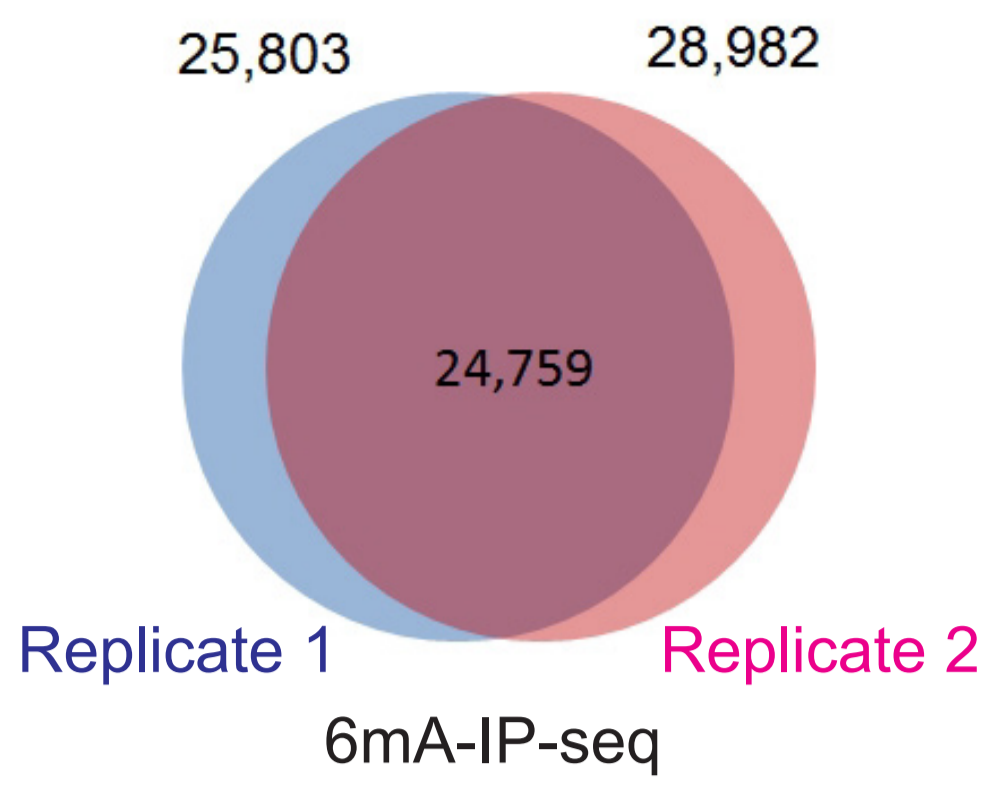

B

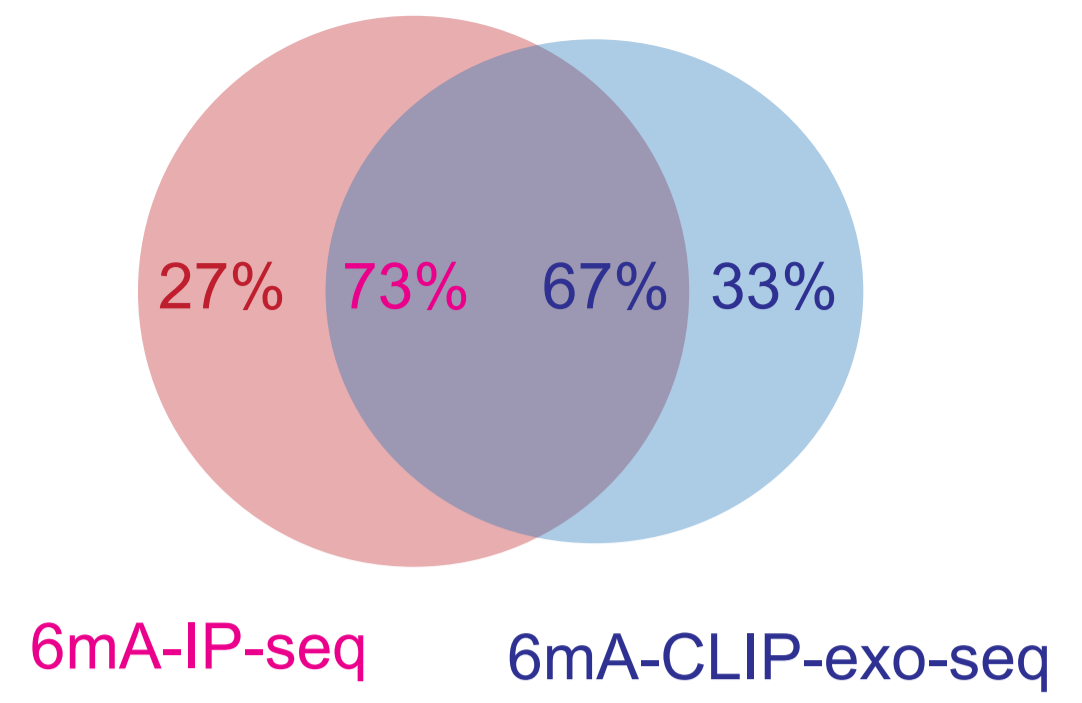

C

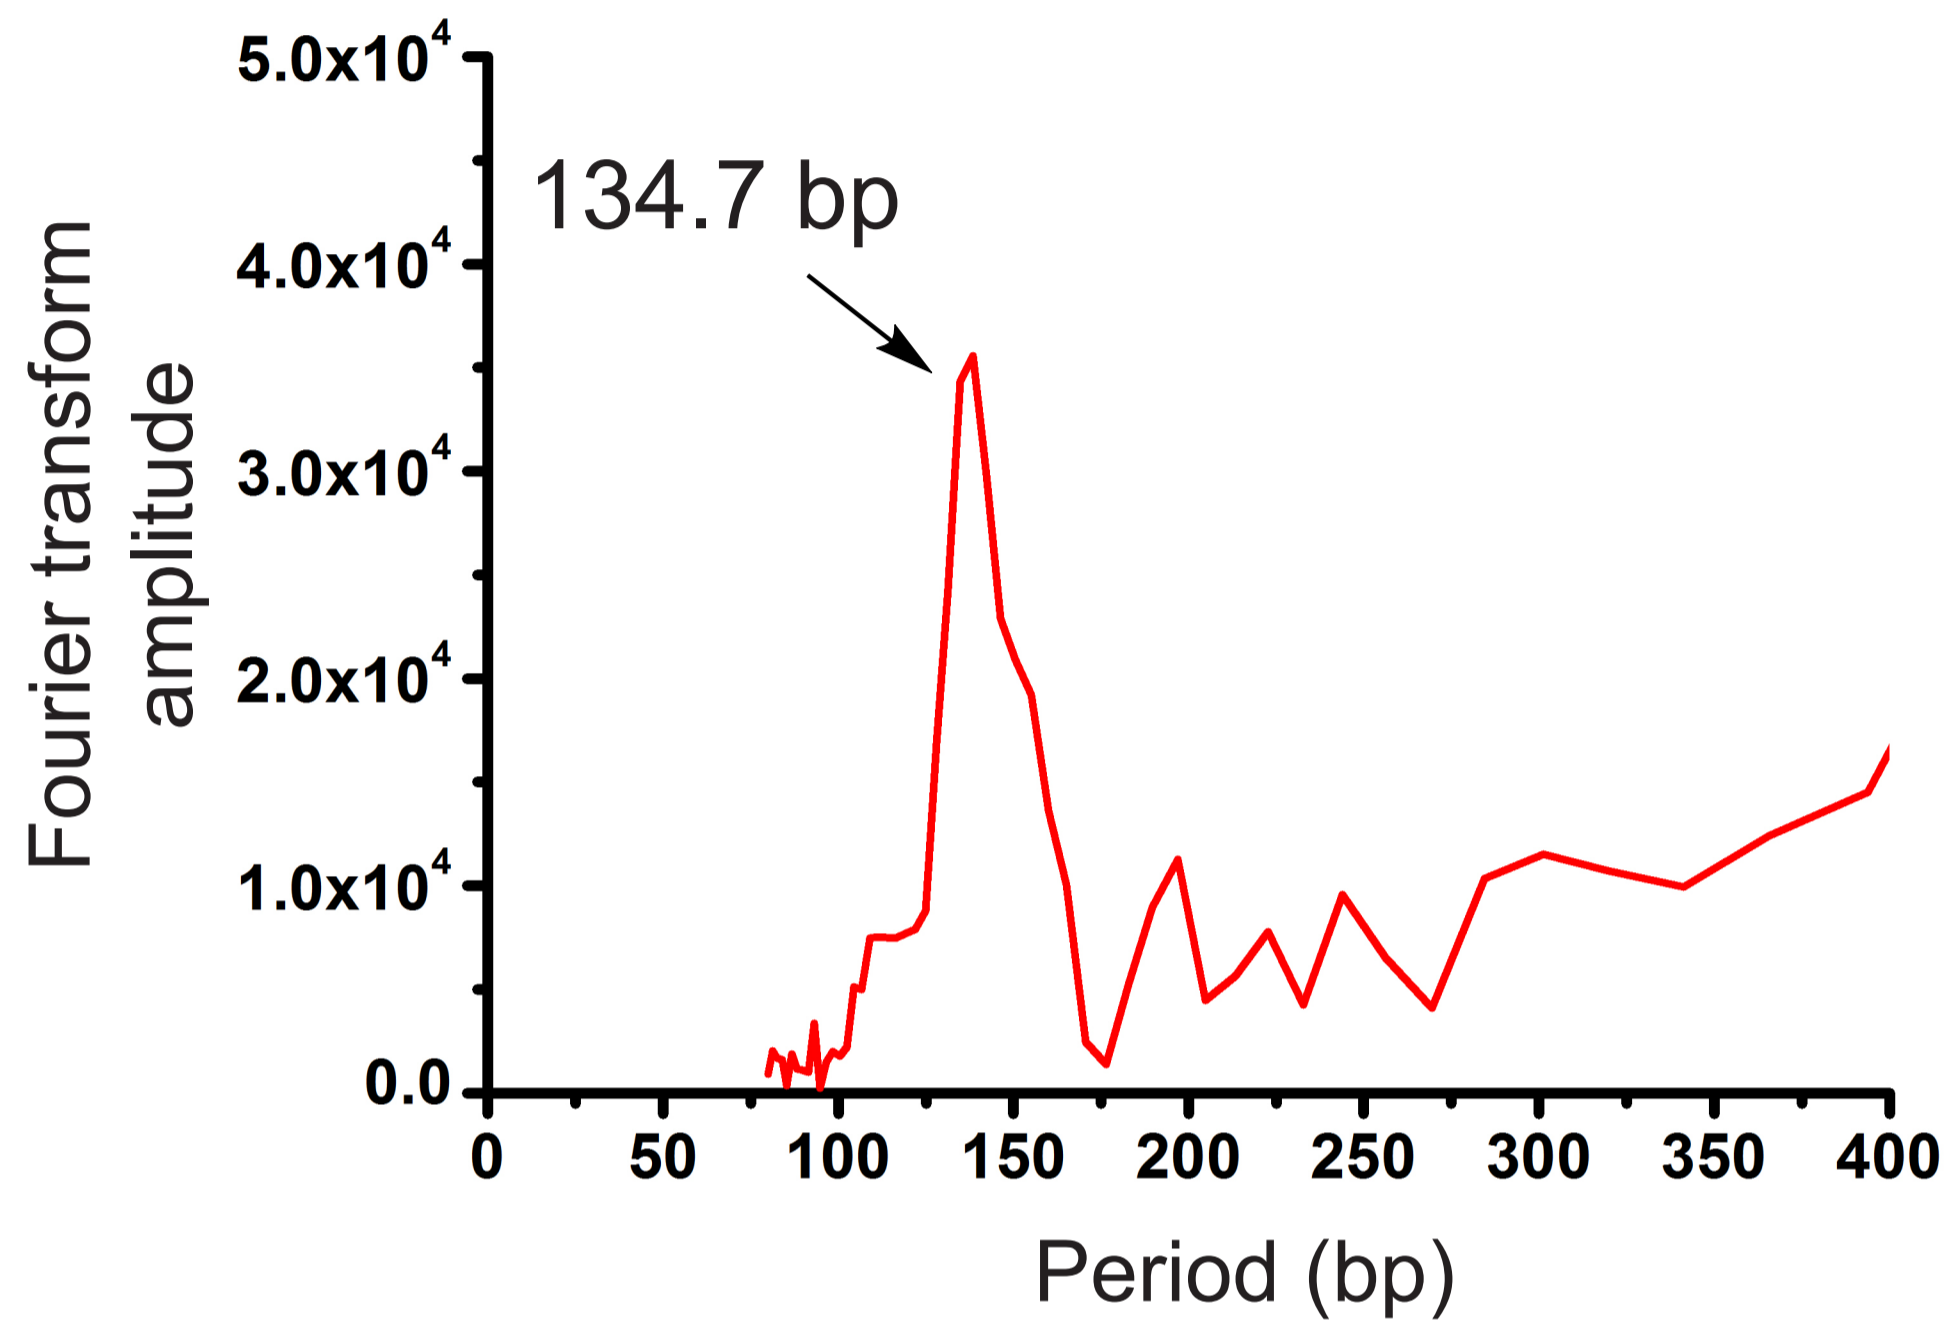

Supplement: NIHMS680140-supplement-3.pdf [file NIHMS680140-supplement-3.pdf]

**A**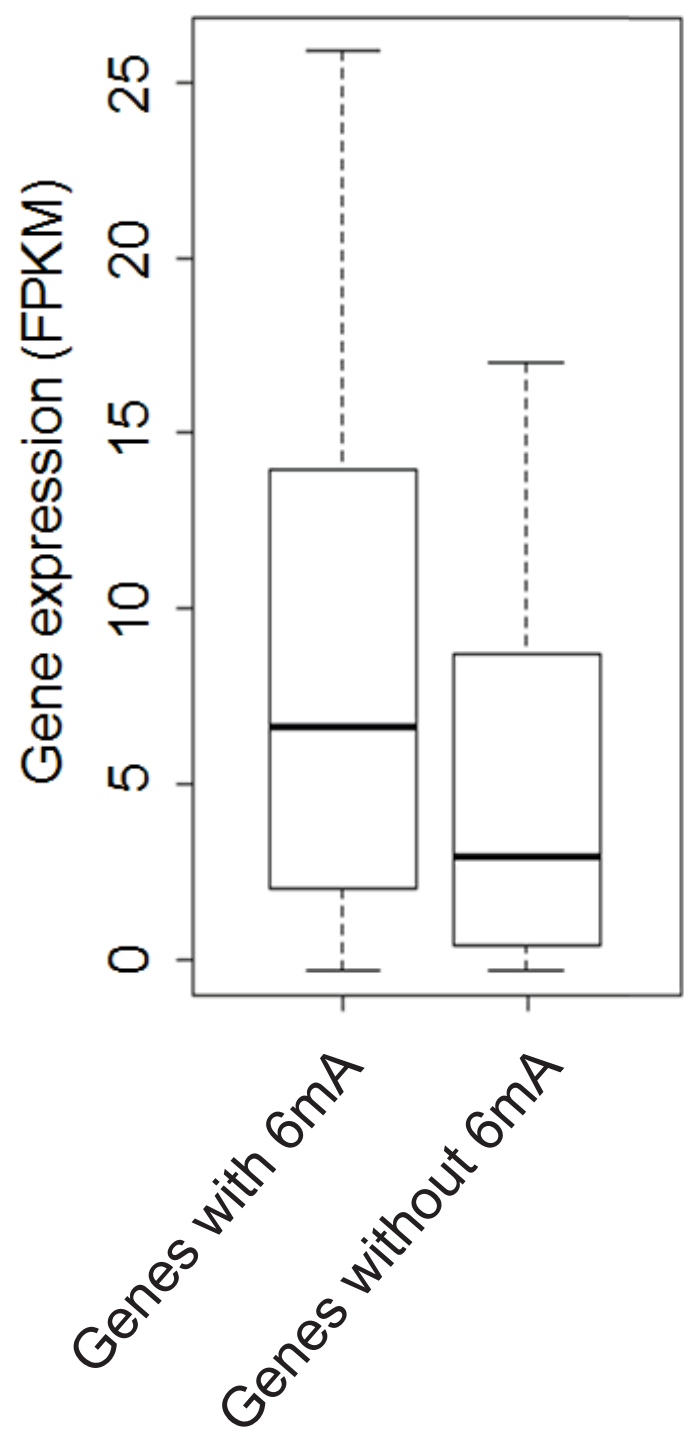**B**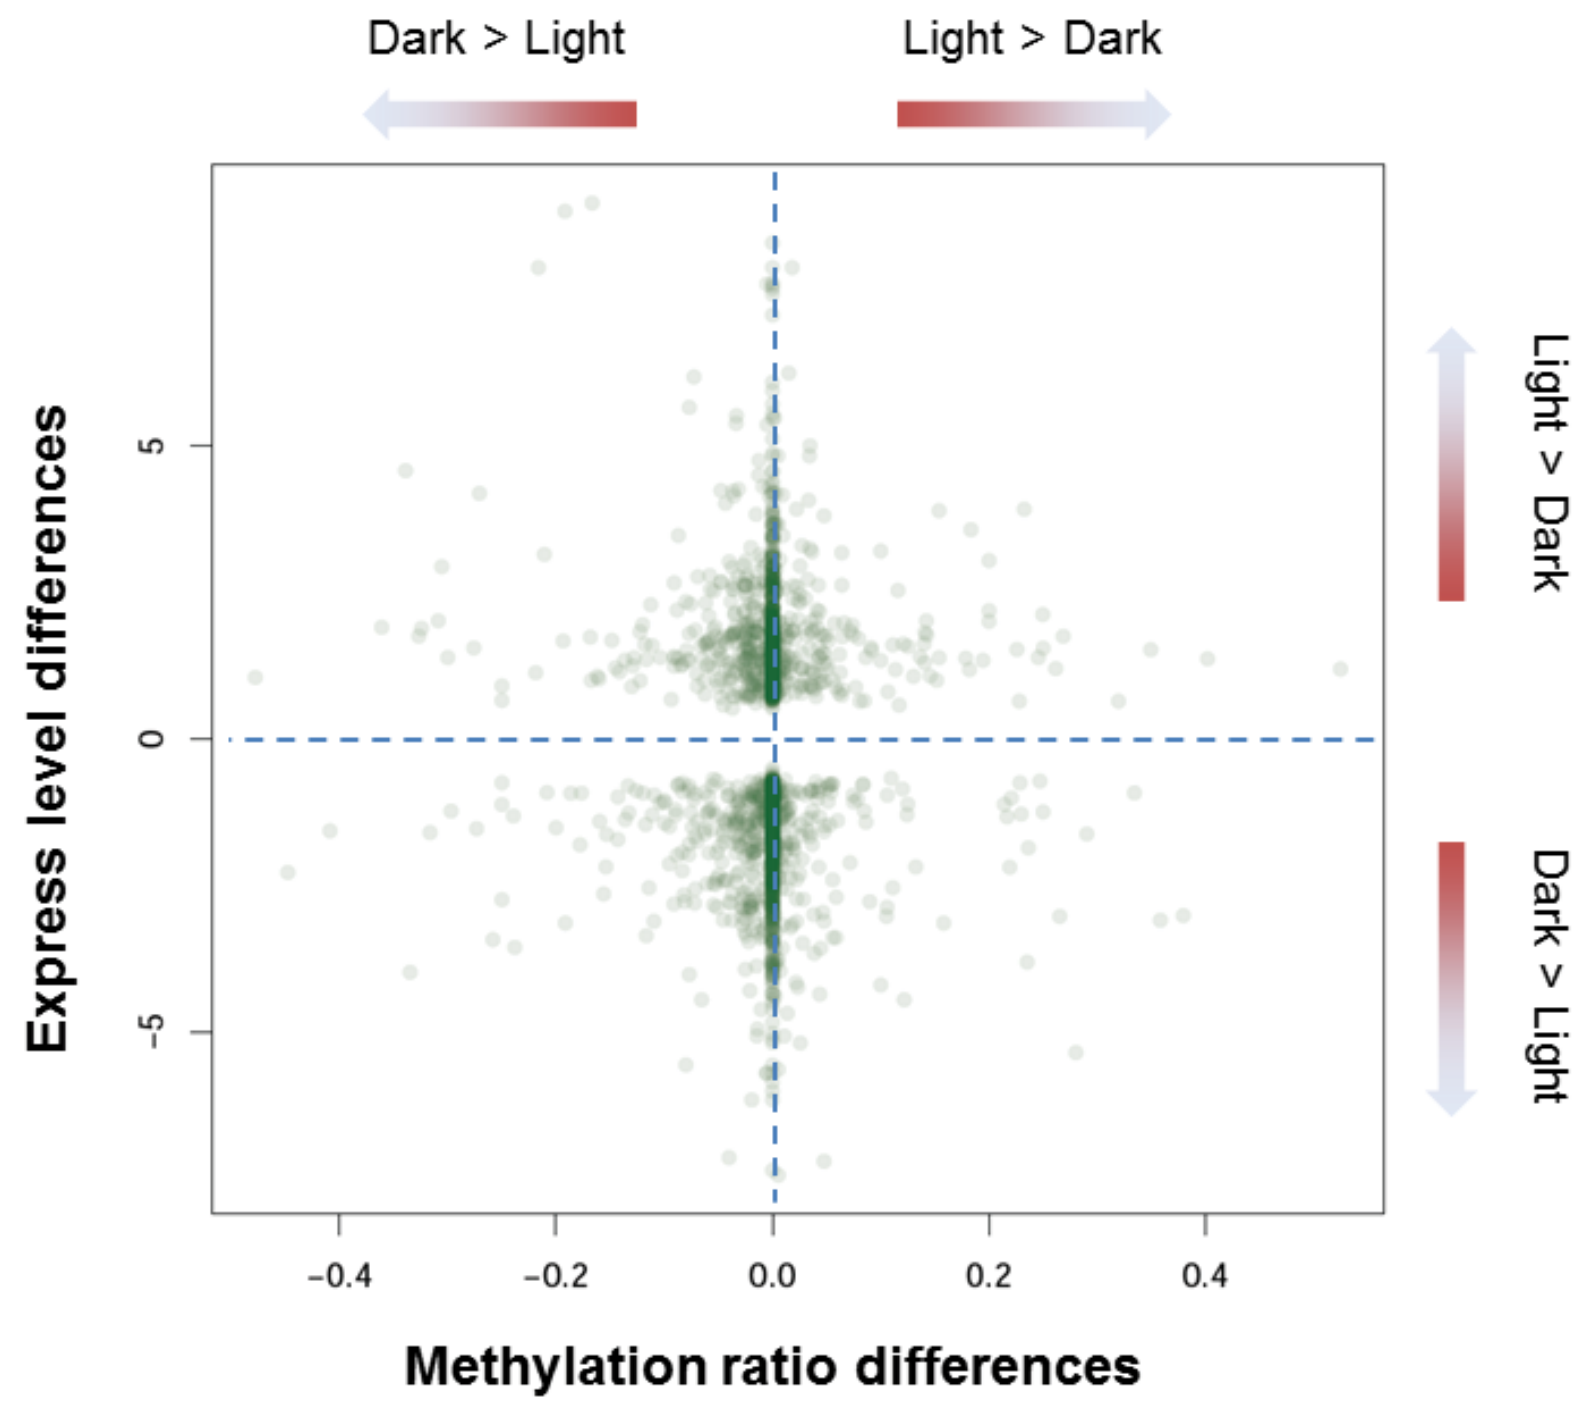**C**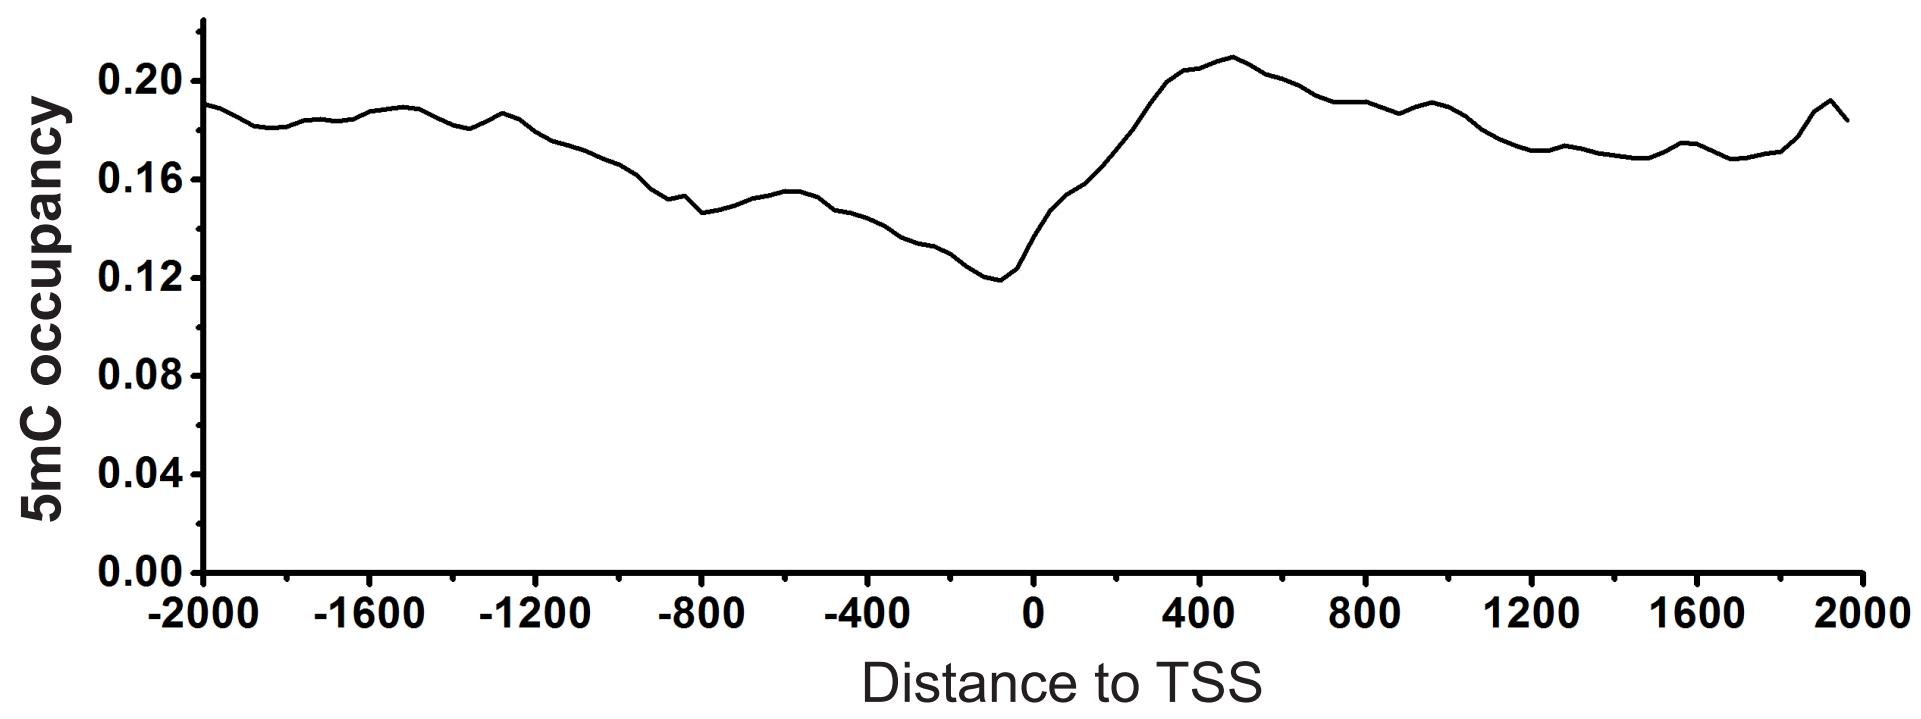**D**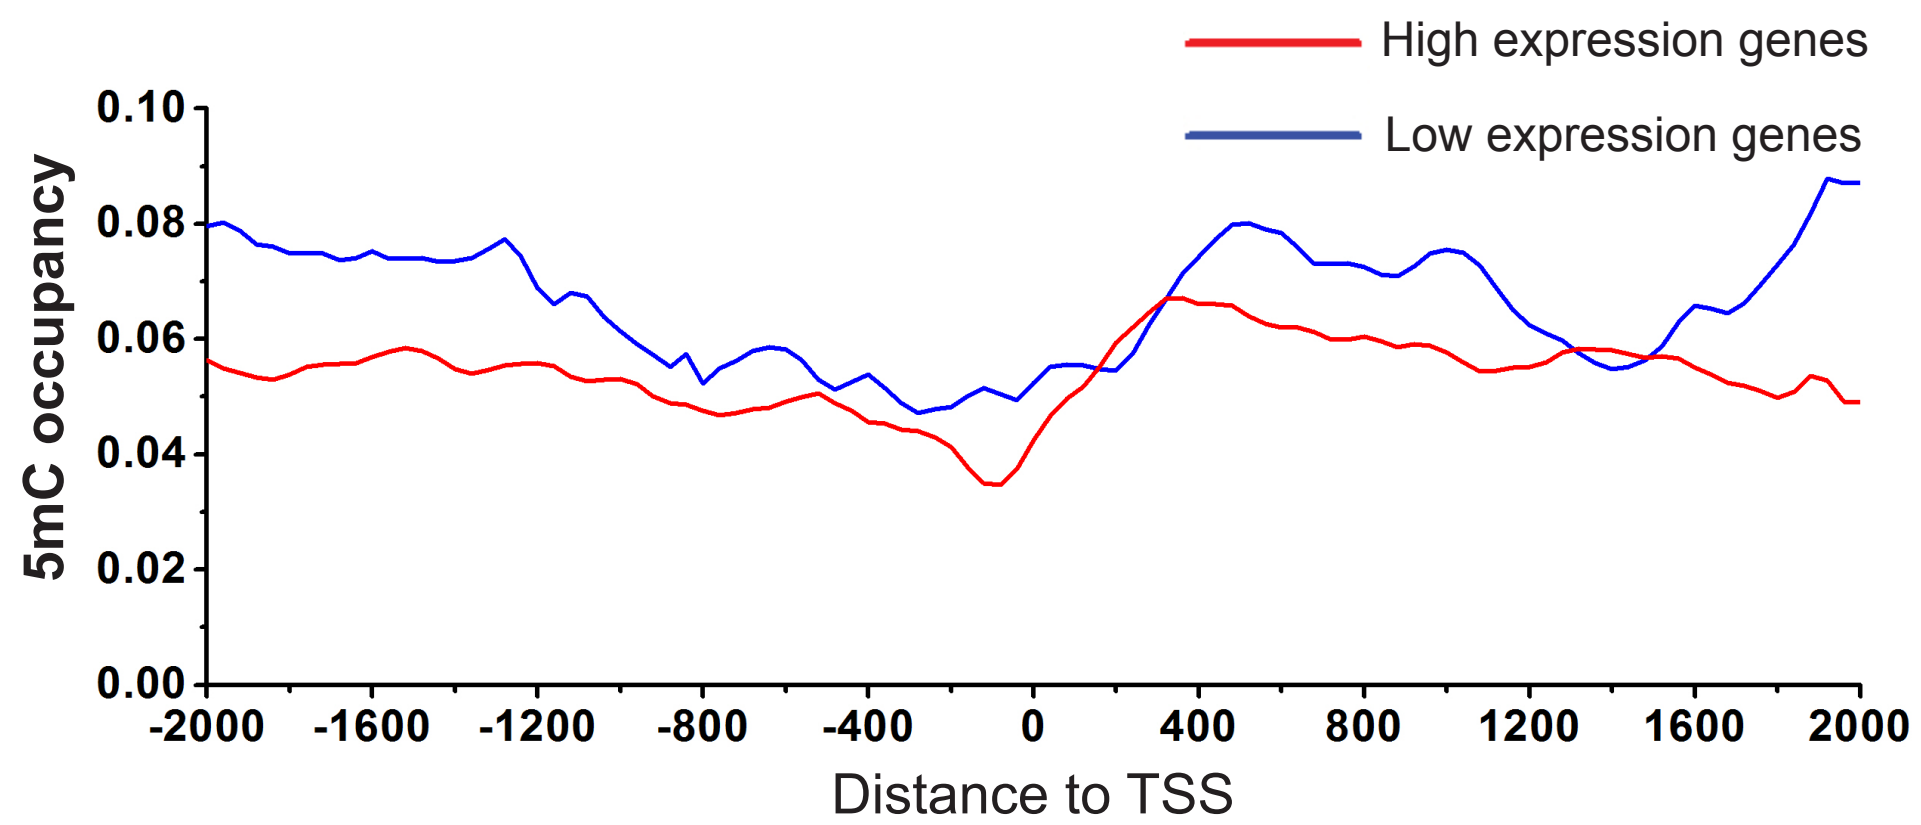

Supplement: NIHMS680140-supplement-7.pdf [file NIHMS680140-supplement-7.pdf]
